# **An ancient clade of *Penelope*-like retroelements with permuted domains is present in the green lineage and protists, and dominates many invertebrate genomes**

Rory J. Craig<sup>1†</sup>, Irina A. Yushenova<sup>2†</sup>, Fernando Rodriguez<sup>2</sup>, Irina R. Arkhipova<sup>2\*</sup>

<sup>1</sup>Institute of Evolutionary Biology, University of Edinburgh, Edinburgh, UK

<sup>2</sup>Josephine Bay Paul Center for Comparative Molecular Biology and Evolution, Marine Biological Laboratory, Woods Hole, MA, USA

\*Corresponding author. Email: [iarkhipova@mbl.edu](mailto:iarkhipova@mbl.edu); [rory.craig@ed.ac.uk](mailto:rory.craig@ed.ac.uk).

†These authors contributed equally to this work

**Running title:** Diversity of *Penelope*-like retrotransposons

**Key words:** transposable elements; retrotransposons; reverse transcriptase; GIY-YIG endonuclease; selenoproteins; microsatellites

## **ORCID:**

0000-0002-6262-0008 (R.C.)

0000-0001-6291-6215 (I.Y.)

0000-0003-4044-8734 (F.R.)

0000-0002-4805-1339 (I.A.)

## 1 ABSTRACT

2 *Penelope*-like elements (PLEs) are an enigmatic clade of retroelements whose reverse  
3 transcriptases (RTs) share a most recent common ancestor with telomerase RTs. The  
4 single ORF of canonical EN+ PLEs encodes RT and a C-terminal GIY-YIG  
5 endonuclease (EN) that enables intrachromosomal integration, while EN- PLEs lack  
6 endonuclease and are generally restricted to chromosome termini. EN+ PLEs have only  
7 been found in animals, except for one case of horizontal transfer to conifers, while EN-  
8 PLEs occur in several kingdoms. Here we report a new, deep-branching PLE clade with  
9 a permuted domain order, whereby an N-terminal GIY-YIG endonuclease is linked to a  
10 C-terminal RT by a short domain with a characteristic Zn-finger-like motif. These N-  
11 terminal EN+ PLEs share a structural organization, including pseudo-LTRs and complex  
12 tandem/inverted insertions, with canonical EN+ PLEs from *Penelope/Poseidon*,  
13 *Neptune* and *Nematis* clades, and show insertion bias for microsatellites, but lack  
14 hammerhead ribozyme motifs. However, their phylogenetic distribution is much broader.  
15 The *Naiad* clade is found in numerous invertebrate phyla, where they can reach tens of  
16 thousands of copies per genome. *Naiads* in spiders and clams independently evolved to  
17 encode selenoproteins. *Chlamys*, which lack the CCHH motif universal to PLE  
18 endonucleases, occur in green algae, spike mosses (targeting ribosomal DNA) and the  
19 slime mold *Physarum*. Unlike canonical PLEs, RTs of N-terminal EN+ PLEs contain the  
20 insertion-in-fingers domain, strengthening the link between PLEs and telomerases.  
21 Additionally, we describe *Hydra*, a novel metazoan C-terminal EN+ clade. Overall, we  
22 conclude that PLE diversity, distribution and abundance is comparable to non-LTR and  
23 LTR-retrotransposons.

24  
25  
26  
27  
28  
29  
30

## 31 INTRODUCTION

32

33 Transposable elements (TEs) are characterized by their intrinsic ability to move within  
34 and between genomes. In eukaryotes, TEs contribute not only to structural organization  
35 of chromosomes and variation in genome size, but also to genetic and epigenetic  
36 regulation of numerous cellular processes (Wells and Feschotte 2020). TEs are  
37 traditionally divided into two classes, based on the presence (class I, retrotransposons)  
38 or absence (class II, DNA transposons) of an RNA intermediate in the transposition  
39 cycle. Retrotransposons, in turn, are divided into subclasses based on the presence or  
40 absence of long terminal repeats (LTRs): LTR-retrotransposons are framed by direct  
41 repeats, phylogenetically close DIRS elements by split inverted repeats, non-LTR  
42 retrotransposons lack terminal repeats, and *Penelope*-like elements (PLEs) have a  
43 special kind of repeats called pseudo-LTRs (pLTRs), which may be in direct or inverted  
44 orientation. Repeat formation in each subclass is associated with the combined action  
45 of phylogenetically distinct clades of reverse transcriptase (RT) domain fused to  
46 different types of endonuclease/phosphotransferase (EN) domains: DDE-type  
47 integrases (IN) or tyrosine recombinases (YR) in LTR-retrotransposons; restriction  
48 enzyme-like (REL) or apurinic /apyrimidinic (AP) endonucleases in non-LTR  
49 retrotransposons; and GIY-YIG endonucleases in PLEs (Arkhipova 2017). The fusion of  
50 EN to RT is typically C-terminal, with the exception of an N-terminal EN in *copia*-like  
51 LTR-retrotransposons and in AP-containing non-LTR retrotransposons. The concerted  
52 action of RT and EN that combines cleavage and joining of DNA strands with cDNA  
53 synthesis during retrotransposition results in characteristic terminal structures that  
54 define the boundaries of new insertions.

55

56 The GIY-YIG EN domain typically associated with PLEs may have its evolutionary  
57 origins in bacterial group I introns, which are not retroelements (Stoddard 2014). The  
58 group I intron-encoded homing ENs are characterized by long recognition sequences,  
59 and act essentially as monomeric nickases, cleaving DNA on one strand at a time. The  
60 relatively short GIY-YIG cleavage module (~70 aa) is often tethered to additional DNA-  
61 binding domains for target recognition (Derbyshire, et al. 1997; Van Roey, et al. 2002).

62 In eukaryotic PLEs, the activity of the recombinant GIY-YIG EN has been studied *in*  
63 *vitro* for *Penelope* elements of *Drosophila virilis*, where it displayed several properties  
64 expected from homology to prokaryotic enzymes, such as functional catalytic residues,  
65 nicking activity producing a free 3'-OH for RT priming, and moderate target preferences  
66 (Pyatkov, et al. 2004). Variable distance between first-strand cleavage of DNA during  
67 target-primed reverse transcription (TPRT) and second-strand cleavage upon TPRT  
68 completion dictates the variable length of the target-site duplication (TSD), which is  
69 observed at the integration site. Phylogenetically, PLE ENs form a distinct cluster within  
70 a large GIY-YIG nuclease superfamily, where diverse homing ENs occupy a central  
71 position (Dunin-Horkawicz, et al. 2006). PLE ENs are distinguished from those of  
72 homing ENs by the presence of a highly conserved CCHH Zn-finger motif, where the  
73 two cysteines are located directly between the GIY and YIG motifs (Arkhipova 2006).  
74  
75 Phylogenetic history of the longer RT domain is much more informative and reveals a  
76 sister relationship between PLEs and telomerase RTs (TERTs), which add G-rich  
77 telomeric repeats to extend eukaryotic chromosome ends (Arkhipova, et al. 2003). All  
78 described PLEs form two major groups: endonuclease-deficient (EN-) PLEs,  
79 retroelements found in several eukaryotic kingdoms at or near telomeres, and  
80 endonuclease-containing (EN+) PLEs, which harbor a C-terminal GIY-YIG EN enabling  
81 retrotransposition throughout the genome (Fig. 1) (Gladyshev and Arkhipova 2007).  
82 Three large EN+ PLE clades have been named *Penelope/Poseidon*, *Neptune* and  
83 *Nematis*, the latter two being characterized by the presence of an additional conserved  
84 Zn-finger motif in the linker between RT and EN (Arkhipova 2006). Two EN- RT clades,  
85 *Athena* and *Coprina*, lack the EN domain entirely, but display a unique ability to attach  
86 to exposed G-rich telomeric repeat overhangs, assisted by stretches of reverse-  
87 complement telomeric repeats combined with adjacent hammerhead ribozyme motifs  
88 (HHR) (Gladyshev and Arkhipova 2007; Arkhipova, et al. 2017). Despite the ancient  
89 origin of PLEs predating their divergence from TERTs, which are pan-eukaryotic, the  
90 phylogenetic distribution of EN+ PLEs has so far been restricted to animals, with one  
91 exception of documented horizontal transfer to conifers (Lin, et al. 2016). Here we  
92 report the discovery of a novel deep-branching EN+ PLE clade, where the GIY-YIG EN

93 is unexpectedly positioned N-terminally to the RT. A clade of these elements present in  
94 animals, termed *Naiad*, contains the GIY-YIG domain bearing the characteristic Zn-  
95 fingers found in canonical EN+ PLEs, while a second group, termed *Chlamys*, are  
96 present in green algae, spike mosses and the slime mold *Physarum*, and lack both EN  
97 Zn-finger motifs. These results uncover hitherto unknown PLE diversity, which spans all  
98 eukaryotic kingdoms, testifying to their ancient origins. We also report that *Naiads* from  
99 species as diverse as spiders and clams can code for selenoproteins, which have not  
100 previously been described in any TEs.

101

## 102 RESULTS

103

### 104 ***Novel PLEs with N-terminal location of the GIY-YIG endonuclease domain***

105

106 While cataloguing PLEs in several recently sequenced genomes, such as the  
107 acanthocephalan (*Pomphorhynchus laevis*) and a bdelloid rotifer (*Didymodactylos*  
108 *carosus*), as well as a darwinulid ostracod (*Darwinula stevensoni*) (Mauer, et al. 2020;  
109 Nowell, et al. 2021; Schön, et al. 2021), we noticed the absence of the GIY-YIG domain  
110 at the C-terminus of several PLEs, which is typically indicative of EN- PLEs. In these  
111 cases, however, extending the 5'-end of the frequently truncated PLE copies revealed a  
112 conserved N-terminal GIY-YIG EN domain, typically 220-275 aa in length. A high  
113 degree of 5'-truncation apparently precluded earlier identification of this novel type of  
114 PLEs. For instance, Repbase, a comprehensive database of eukaryotic TEs (Bao, et al.  
115 2015), contains two PLEs consistently appearing as top RT matches to the novel PLEs,  
116 yet having no N-terminal EN domain (*Penelope-2\_CGi* from the Pacific oyster  
117 *Crassostrea gigas* and *Penelope-1\_EuTe* from the Texas clam shrimp *Eulimnadia*  
118 *texana*). We extended the 767-aa *Penelope-2\_CGi\_1p* consensus in the 5'-direction  
119 and compared it with two sibling species, *Crassostrea virginica* and especially  
120 *Saccostrea glomerata*, where this element is mostly intact, revealing an N-terminal GIY-  
121 YIG domain which brings the total ORF length up to 876 aa in *C. gigas* (still 5'-  
122 truncated) and to 1024 aa in *S. glomerata*.

123 We then conducted an extensive database search for representatives of this previously  
 124 undescribed type of PLEs in sequenced genomes, relying primarily on the N-terminal  
 125 position of the GIY-YIG domain and several characteristic motifs (see below) to  
 126 discriminate between novel and canonical PLEs (Fig. 1). Our search revealed a  
 127 surprising diversity of hosts from eight animal phyla, including ctenophores, cnidarians,  
 128 rotifers, nematodes, arthropods, mollusks, hemichordates, and vertebrates (fish).  
 129 Additionally, about a dozen hits on short contigs were annotated as bacterial, however  
 130 upon closer inspection these were discarded as eukaryotic contaminants from  
 131 metagenomic assemblies with an incorrect taxonomic assignment (Arkhipova 2020).  
 132 Out of 36 animal host species, most were aquatic (26), 6 were parasitic, and only 4  
 133 were free-living terrestrial species (2 spiders and 2 nematodes). We therefore chose the  
 134 name *Naiad* for this newly discovered type of PLEs.  
 135

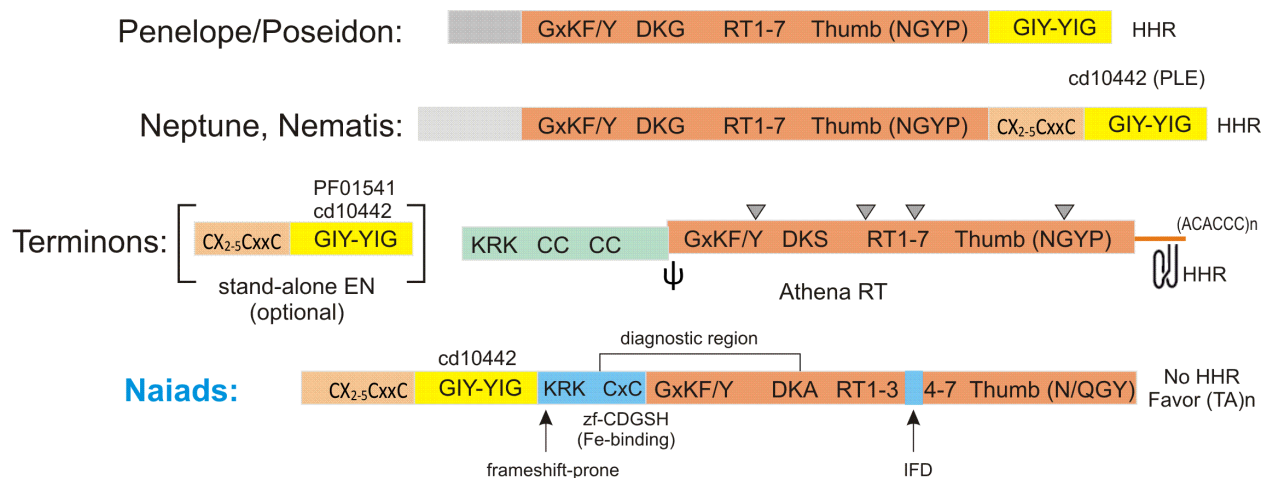

136  
 137  
 138 **Fig. 1.** Domain architecture of the major PLE types found in animals. Domains are colored as follows: RT  
 139 (peach), GIY-YIG (yellow), ORF1 (pink) often separated by a frameshift and a pseudoknot (ψ), Zn-fingers  
 140 (sand), and N-terminal domains with no characteristic motifs (gray). The organization of *Coprina* elements  
 141 from fungi, protists and plants is similar to *Athena*. *Naiad*-specific domains are in blue. CC, coiled-coil;  
 142 IFD, insertion in fingers domain; HHR, hammerhead ribozyme motif (also present in pLTRs of canonical  
 143 EN+ PLEs); KRK, nuclear localization signal; (ACACCC)<sub>n</sub>, short stretches of reverse-complement  
 144 telomeric repeats in EN-deficient PLEs. Conserved introns are denoted by triangles. Also shown are the  
 145 most conserved amino acid motifs and the highest-scoring PFAM/CD domain matches. Not to scale.

146

## 147 **Structural characteristics of *Naiad* elements**

148

149 Structurally, *Naiad* insertions exhibit most of the previously known characteristic  
150 features of PLEs (Evgen'ev and Arkhipova 2005; Arkhipova 2006). Insertions show a  
151 high degree of 5'-truncation and are often organized into partial tandems, so that a full-  
152 length copy would be preceded by a partially truncated copy, forming a pLTR. Often,  
153 there is also an inverted 5'-truncated copy found immediately adjacent at the 5'-end,  
154 leading to formation of inverted repeats flanking the entire insertion unit (Fig. 2). Such  
155 complex structures of insertions often lead to problems in WGS assembly, especially  
156 short read-based. To further complicate boundary recognition, a 30-40 bp extension  
157 ("tail") is usually found at either end of the insertion unit, most likely resulting from EN-  
158 mediated resolution of the transposition intermediate. However, a notable difference  
159 between *Naiads* and canonical PLEs is the absence of any detectable hammerhead  
160 ribozyme motifs (HHR), which are typically located within pLTRs (Cervera and De la  
161 Peña 2014; Arkhipova, et al. 2017). Ignoring any tandemly inserted sequence, the main  
162 body of full-length *Naiad* copies are generally 3.4 - 4.4 kb.

163

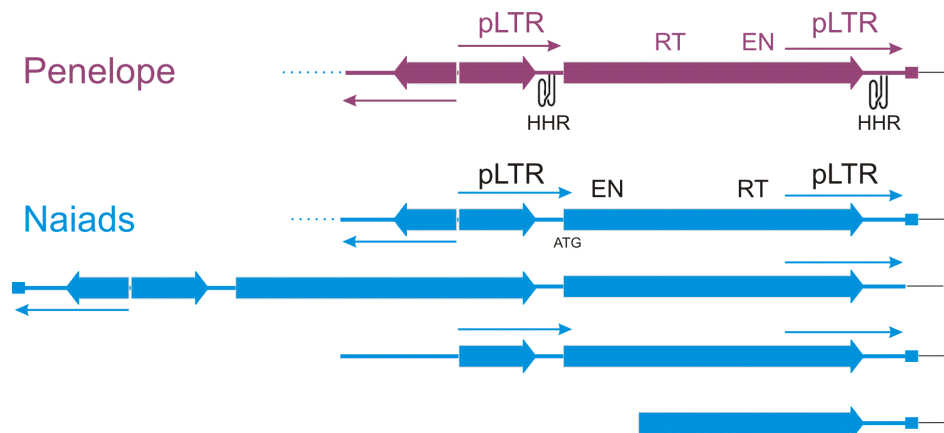

164

165

166 **Fig. 2.** Structural arrangements of PLE copies. Shown is the typical arrangement of two or more ORFs in  
167 partial tandems, forming pseudo-LTRs (pLTRs) denoted by arrows. An inverted 5'-truncated copy is often  
168 found adjacent to the upstream pLTR, forming an inverted-repeat structure. A small square denotes a 30-  
169 40 bp extension ("tail") that is usually present only on one end of the insertion. HHR, hammerhead  
170 ribozyme motif. For *Penelope*, only the most typical structure is shown, but all other variants also  
171 observed.



172 Sequence conservation of the RT domain is strong enough to retrieve RTs of canonical  
173 PLEs in a BLAST search, thus it is practical to rely on several diagnostic regions, such  
174 as the CxC motif (showing weak homology to zf-CDGSH Fe-binding Zn-fingers) and the  
175 DKG motif (Arkhipova 2006), which in *Naiads* is modified to DKA (Fig. 1). In the core  
176 RT, the region between RT3(A) and RT4(B) is ~20 aa longer than in other PLEs and  
177 corresponds in position to the IFD (insertion in the fingers domain) of TERTs (Lingner,  
178 et al. 1997; Lue, et al. 2003) (Fig. S1). Interestingly, the IFD is missing from *Naiads* in  
179 chelicerates (spiders and the horseshoe crab) and *D. stevensoni*, which resemble  
180 canonical PLEs in this region. Finally, between RT and the upstream EN domain there  
181 is usually a large KR-rich block harboring a nuclear localization signal (Fig. 3B). This  
182 block, which is rich in adenines, is particularly prone to frameshift mutations resulting in  
183 detachment of the EN domain from RT and its eventual loss. Such mutations apparently  
184 prevented earlier recognition of the EN domain in *C. gigas* and *E. texana* PLEs from  
185 Rebase (Bao, et al. 2015).

186  
187 The EN domain in *Naiads* displays most similarity to the GIY-YIG EN of other PLEs  
188 (cd10442), especially those in the *Neptune* and *Nematis* clades which harbor an  
189 additional conserved CX<sub>2-5</sub>CxxC Zn-finger-like motif (lengthened by 5-aa insert in  
190 mussels) upstream from the GIY-YIG motif (Fig. 1, 3A, S2). Perhaps it may facilitate  
191 recognition of (TA)<sub>n</sub> microsatellite sequences, which often serve as preferred targets for  
192 *Naiad* insertion. Its designation as a Zn-finger is tentative, as it shows variably non-  
193 significant matches to ZnF\_NFX, ZnF\_A20, ZnF\_TAZ, ZnF\_U1 or RING fingers in  
194 SMART database searches (Letunic, et al. 2020). The CCHH Zn-finger-like motif with  
195 two cysteines inside the GIY-YIG core, characteristic of all canonical EN+ PLEs  
196 (Arkhipova 2006), is also present, and the catalytic domain beyond the GIY-YIG core is  
197 well conserved and includes the R, H, E and N residues implicated in catalysis (Van  
198 Roey, et al. 2002). Thus, despite the permuted arrangement of the RT and EN domains,  
199 *Naiads* share the peculiarities of structural organization with other PLEs, indicating that  
200 their retrotransposition likely proceeds through a similar mechanism.

201





217 genomes in comparison to known PLE types. For example, inspection of TE landscape  
 218 divergence profiles in the acanthocephalan *P. laevis* (Fig. 4A) shows that PLE families  
 219 are responsible for 8.9% of the genome, of which *Naiad-1* occupies 7.8%. The  
 220 remaining 12 *Neptune* and 4 *Penelope/Poseidon* families combined occupy only 1.1%  
 221 of the genome (Fig. 4B).

222

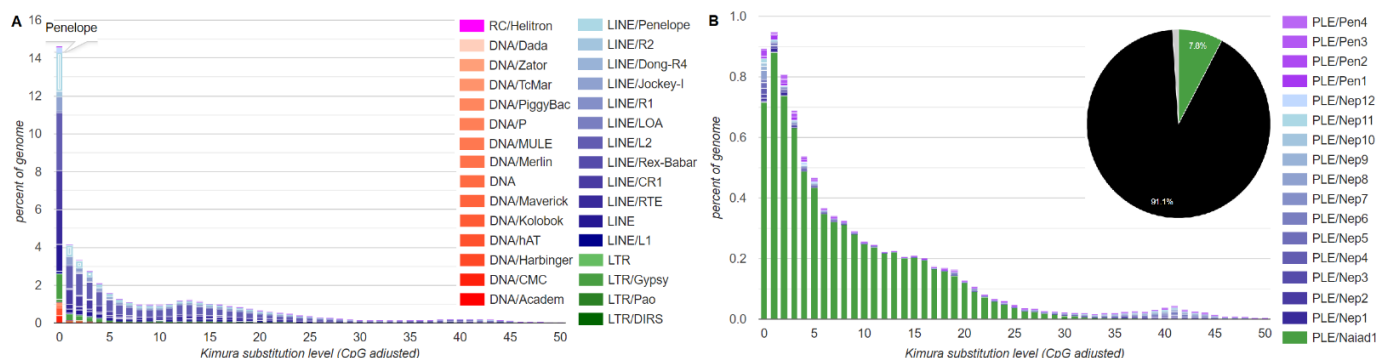

223

224 **Fig. 4.** Landscape divergence plots showing TE activity over time and genome occupancy in the  
 225 acanthocephalan *Pomphorhynchus laevis*. **(A)** All TEs, with PLEs in light blue; **(B)** PLEs only, subdivided  
 226 by families, with *Naiad1\_Plae* family shown in green on the divergence plot and on the inserted pie chart.

227

228 We estimated copy numbers in each host species by querying each WGS assembly  
 229 with the corresponding *Naiad* consensus sequence and counting the number of 3'-ends  
 230 at least 80 bp in length. This approach avoids counting multiple fragments in lower-  
 231 quality assemblies. Among hosts, significant variation in *Naiad* copy number can be  
 232 observed, even between closely related species (Fig. 5). Copy numbers mostly reflect  
 233 activity levels: some *Naiads* are apparently intact and are still successfully amplifying,  
 234 while in other species they have been inactivated a long time ago and required  
 235 numerous ORF corrections to yield an intact consensus. Surprisingly, several marine  
 236 invertebrates, such as oysters, clams and crabs, harbor tens of thousands of *Naiad*  
 237 copies, with nearly 37,000 in the blue crab *Paralithodes platypus*. The lack of HHR  
 238 motifs obviously has not hampered the proliferative capacity of *Naiads*, as they can  
 239 outnumber canonical HHR-bearing PLE families in the same species by several orders  
 240 of magnitude, as in *P. laevis* (Fig. 4B).

241 It is also evident that the *Naiad* phylogeny does not necessarily parallel that of host  
242 species. While some species, such as *Clytia hemisphaerica* or *D. stevensoni*, have  
243 experienced substantial within-species *Naiad* diversification, harboring four families  
244 each, others, such as hemichordates (*Saccoglossus kowalevskii*, *Ptychodera flava*), or  
245 cephalopods (*Architeuthis dux*, *Euprymna scolopes*, and *Octopus spp.*), harbor families  
246 belonging to different *Naiad* lineages (Fig. 5A). The fish *Naiads* (from *Chatrabus*  
247 *melanurus*, *Thalassophryne amazonica* and *Eptatretus burgeri*) do not form a  
248 monophyletic clade, while the nematode or arthropod *Naiads* do (Fig. 5A). The overall  
249 distribution pattern is suggestive of vertical inheritance punctuated by occasional  
250 horizontal transfer events and multiple losses.

251

### 252 ***Naiad selenoproteins in clams and spiders***

253

254 The ORFs of four *Naiads*, from two clams (*Sinonovacula constricta* and *Mercenaria*  
255 *mercenaria*) and two spiders (*Stegodyphus dumicola* and *Stegodyphus mimosarum*),  
256 each contained either three (*Naiad\_Smim* and *Naiad\_Mmer*) or four (*Naiad\_sDum* and  
257 *Naiad\_sCon*) in-frame UGA codons. Except for one UGA codon in *Naiad\_sCon*, all  
258 UGA codons corresponded to highly conserved cysteines in the protein sequences of  
259 other *Naiads* (Fig. 3). In all families, UGA codons corresponded to the cysteine  
260 preceding the GIY-YIG motif, and the cysteine eight aa downstream of the DKA motif  
261 (not shown). In spiders, UGA codons corresponded to either the first (*Naiad\_Smim*) or  
262 both the first and second (*Naiad\_sDum*) cysteines in the CX<sub>2-5</sub>CxxC Zn-finger, while in  
263 clams UGA codons corresponded to the first cysteine in the CCHH Zn-finger. The single  
264 remaining UGA codon in *Naiad\_sCon* corresponded to an aa in RT6(D) that was not  
265 strongly constrained.

266

267 Given the correspondence between the in-frame UGA codons and conserved cysteines,  
268 we hypothesized that the ORFs of these *Naiads* may encode selenoproteins, in which  
269 UGA is recoded from stop to selenocysteine (Sec). Recoding is achieved through a *cis*-  
270 acting selenoprotein insertion sequence (SECIS), a Sec-specific tRNA and additional  
271 *trans*-acting proteins (Berry, et al. 1991; Tujebajeva, et al. 2000). In eukaryotes, SECIS



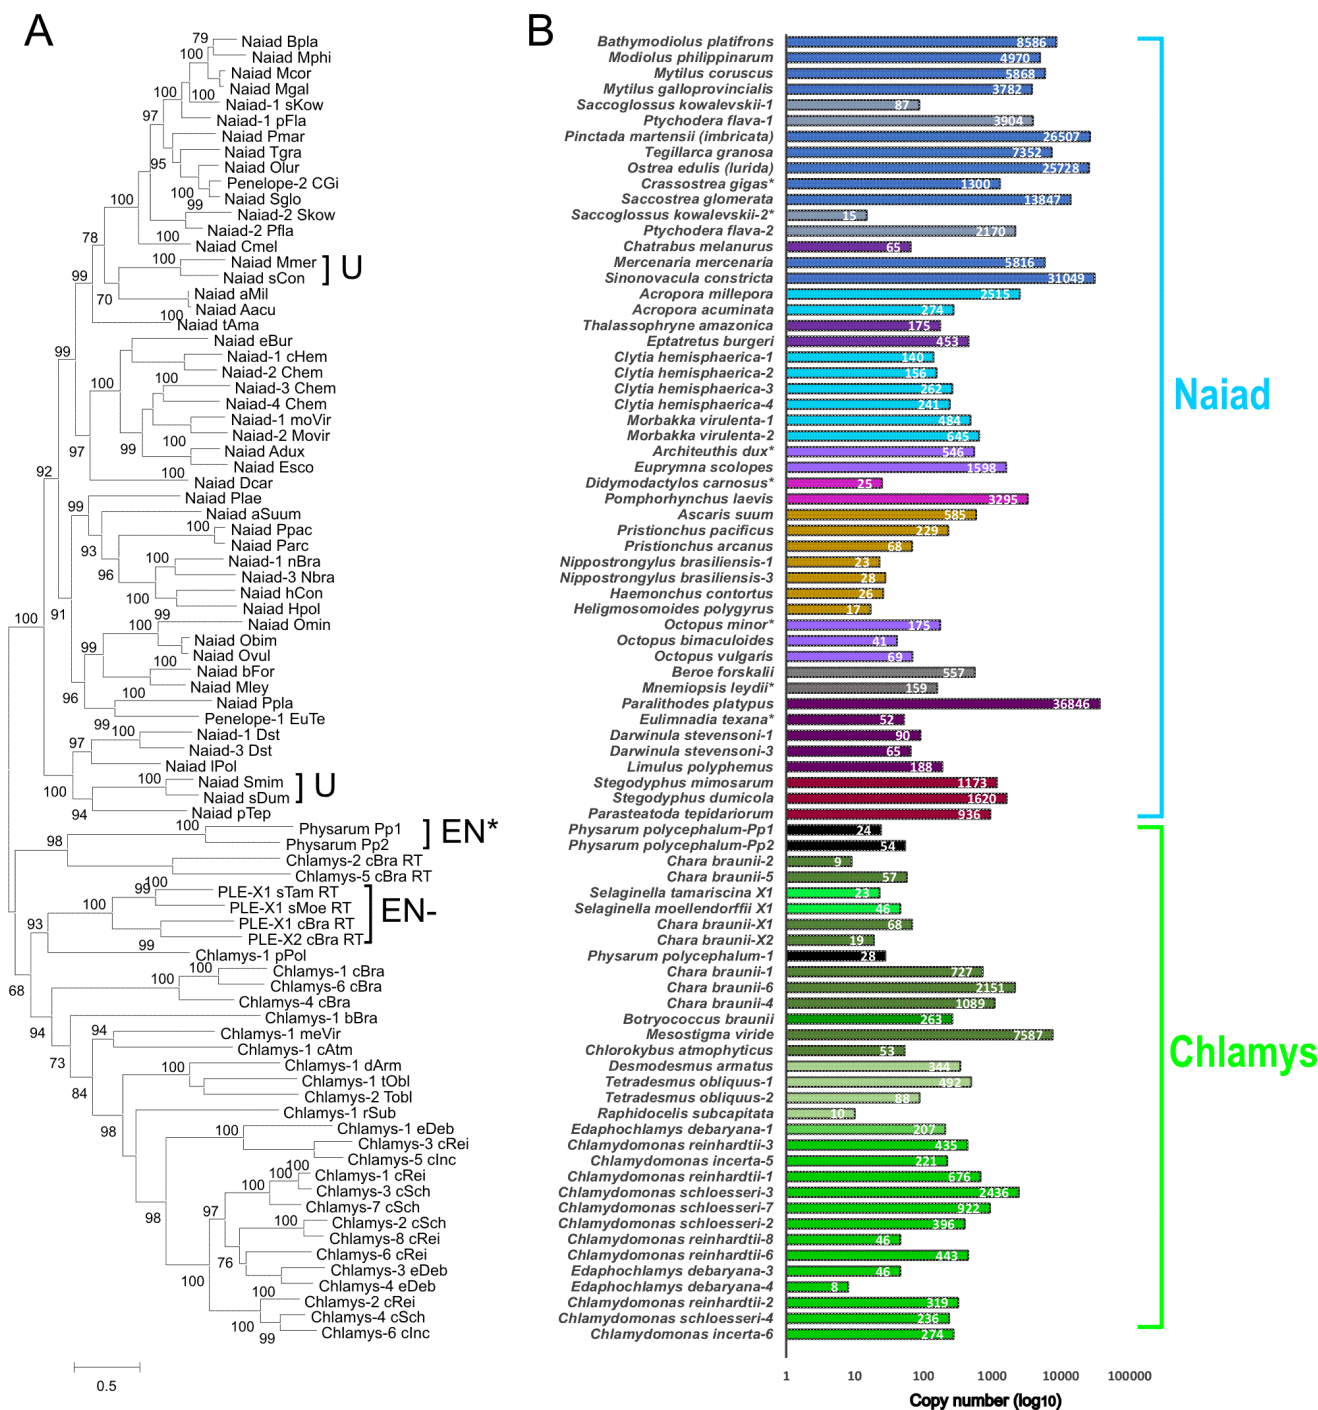

280 elements are located in the 3' UTRs of selenoprotein mRNAs (Low and Berry 1996).  
281 Using SECISearch3 (Mariotti, et al. 2013) to query each consensus sequence, we  
282 identified "grade A" (i.e., the highest confidence) type I SECIS elements in all four of the  
283 families (Fig. S3A). Except for *Naiad-Mmer*, the predicted SECIS elements were located  
284 immediately downstream of the inferred UAA or UAG stop codons (1 – 21 bp  
285 downstream, Fig. S3B), presumably placing the SECIS elements within the 3' UTRs of  
286 each family. In *Naiad-Mmer*, the SECIS overlapped the first non-UGA stop codon,  
287 however there was a UGA codon 7 bp upstream of the SECIS. The recoding of UGA is  
288 position dependent (Turanov, et al. 2013) and a UGA codon in such close proximity to  
289 the SECIS is not expected to efficiently encode Sec (Wen, et al. 1998), suggesting that  
290 this UGA codon may function as stop in *Naiad-Mmer*. Overall, the ORFs of each of the  
291 four families apparently encode selenoproteins that incorporate multiple Sec residues.  
292 Furthermore, following the phylogenetic relationship of *Naiads* presented in Fig. 5A, it is  
293 likely that the evolutionary transition to selenoproteins has occurred independently in  
294 spiders and clams.

295

### 296 **Structurally diverse *Chlamys* elements in the green lineage and protists**

297

298 As part of a recent annotation of TEs in the unicellular green alga *Chlamydomonas*  
299 *reinhardtii* and its close relatives (Craig, et al. 2021), we identified novel PLE families  
300 with N-terminal GIY-YIG domains. These elements were termed *Chlamys*, although  
301 they were not further described. As with *Naiads*, the N-terminal EN<sup>+</sup> PLEs in  
302 *Chlamydomonas* possess several of the defining features of canonical C-terminal EN<sup>+</sup>  
303 PLEs, including genome-wide distributions, frequent 5' truncation and partial tandem  
304 insertions producing pLTRs. As introduced in the following text, *Naiad* and *Chlamys*  
305 share several features and collectively form a strongly supported N-terminal EN<sup>+</sup> clade  
306 (Fig. 5A, Fig. 8), although *Chlamys* elements also possess characteristics that  
307 distinguish them from the newly described metazoan clade.

308

309 The predicted proteins of the *Chlamys* elements included the *Naiad*-specific CxC zf-  
310 CDGSH-like Zn-finger motif and the IFD (Fig. S1, S4). Additionally, all but two *Chlamys*

311 elements (*Chlamys-2\_cBra* and *PLE-X1\_cBra*) lacked HHRs, further strengthening their  
312 evolutionary link to *Naiads*. As before, we used these conserved features to perform an  
313 extensive search for related PLEs in other taxa. We curated *Chlamys* elements from a  
314 wide diversity of green algae, including species from the Chlorophyceae order  
315 Sphaeropleales and the unicellular streptophyte algae *Mesostigma viride* and  
316 *Chlorokybus atmophyticus*. The Sphaeropleales and Chlamydomonadales are  
317 estimated to have diverged in the pre-Cambrian, while chlorophytes and streptophytes  
318 (which includes land plants) possibly diverged more than 1 billion years ago (Del  
319 Cortona et al., 2020). Additional curation identified more distantly related and  
320 structurally diverse families in the chlorophyte *Botryococcus braunii* (class  
321 Trebouxiophyceae), the multicellular streptophyte alga *Chara braunii*, two species of  
322 spike moss (genus *Selaginella*) and the myxomycete slime mold *Physarum*  
323 *polycephalum* (phylum Amoebozoa). Certain *Chlamys* families were also found in very  
324 high copy numbers, most notably in the genomes of the streptophytes *M. viride* and *C.*  
325 *braunii* (Fig. 5B).

326

327 *Chlamys* elements were mostly longer (3.3 – 8.2 kb, not including pLTRs) and more  
328 structurally diverse than *Naiads* (see below). The length of several families was also  
329 increased by the presence of tandem repeats. In the RT domain, the “DKG” motif was  
330 present as DK without a well-conserved third aa, and the IFD was generally longer  
331 (~20-40 aa) than that of *Naiads* (Fig. S1, S4). Targeted insertion at (CA)<sub>n</sub> repeats was  
332 observed for many *Chlamys* elements. Relative to *Naiads*, the most striking difference  
333 was in the EN domain. Although the GIY-YIG EN is N-terminal in both *Chlamys* and  
334 *Naiads*, in *Chlamys* both the linker domain harboring the CX<sub>2-5</sub>CxxC Zn-finger and the  
335 CCHH Zn-finger motif are absent (Fig. S2). Thus, the EN of *Chlamys* differ from both  
336 *Naiads* and canonical C-terminal EN+ PLEs (all of which encode the CCHH motif, with  
337 the CX<sub>2-5</sub>CxxC Zn-finger absent in *Penelope/Poseidon*). The conserved R, H, E and N  
338 aa beyond the GIY-YIG core are all present in *Chlamys*. Finally, *Naiads* formed a well-  
339 supported clade to the exception of all *Chlamys* elements (Fig. 5A). Collectively, *Naiad*  
340 and *Chlamys* are distinguished based on both taxonomic and structural features, and

341 they can be considered as two major ancient groups that together comprise a wider N-  
342 terminal EN+ clade.

343  
344 The minimal *Chlamys* domain organization, which is shared by most families in  
345 *Chlamydomonas*, the Sphaeropleales and the unicellular streptophytes, is represented  
346 by *Chlamys-1\_meVir* in Fig. 6. Five families from *Chlamydomonas* encoded proteins  
347 with plant homeodomain (PHD) finger insertions, which were either located between  
348 RT2a and RT3(A) (Fig. 7) or between the H and E conserved aa within EN. PHD fingers  
349 have been reported from TEs including *CR1* non-LTR elements (Kapitonov and Jurka  
350 2003) and *Rehavkus* DNA transposons (Dupeyron, et al. 2019), where they may play a  
351 role in chromatin restructuring. PHD fingers are present in several other  
352 retrotransposons and DNA transposons in *C. reinhardtii*, and it appears to be a common  
353 accessory domain (Perez-Alegre, et al. 2005; Craig 2021). Several additional domains  
354 were encoded by the more distantly related *Chlamys* elements. Two divergent  
355 organizations were observed in *P. polycephalum* families, the first of which included an  
356 SAP domain inserted between RT7(E) and the RT thumb (*Chlamys-1\_pPol*, Fig. 6).  
357 SAP (SAF A/B, Acinus and PIAS) is a putative DNA-binding domain that has previously  
358 been reported in *Zisupton* DNA transposons (Böhne, et al. 2012). The second type  
359 included the element *Physarum\_Pp1*, which was first described from a 5' truncated  
360 consensus as an unusual PLE with an IFD (Gladyshev and Arkhipova 2007). Extending  
361 the consensus sequence revealed a predicted protein with a reduced N-terminus that  
362 entirely lacked the CxC motif present in all other *Chlamys* and *Naiad*, and included a  
363 reduced EN domain in which the GIY-YIG motif was present but weakly conserved and  
364 the region containing the conserved R, H, E and N aa was absent (Fig. 3A, 6). Although  
365 the *P. polycephalum* genome is highly fragmented, *Physarum\_Pp1* does appear to be  
366 present genome-wide.

367  
368 EN+ PLEs were reported from the *C. braunii* genome project, although Nishiyama, et al.  
369 (2018) did not further describe these elements. We observed three distinct types of  
370 *Chlamys* in *C. braunii*. The first possessed long ORFs (~1,800 aa) encoding peptides  
371 with a C-terminal extension including a motif with weak homology to Josephin and a



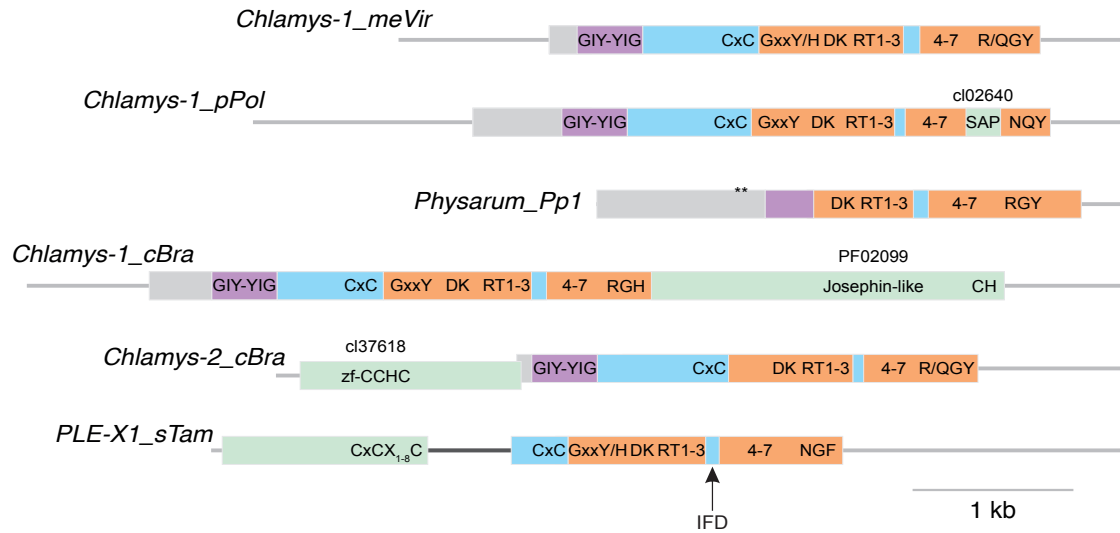

372

373 **Fig. 6.** Structural diversity of *Chlamys* elements. Domain architecture of *Chlamys* elements is represented  
374 by to scale schematics. Thin gray lines represent sequences not present in ORFs. Domains are colored  
375 as follows: RT, peach; GIY-YIG EN, purple; insertions/extensions containing conserved motifs, green; N-  
376 terminal extensions without recognized domains, gray; regions specific to *Naiad* and *Chlamys*, light blue.  
377 Purple is used for the GIY-YIG EN to distinguish the *Chlamys* EN from the *Naiad* EN, which contains the  
378 CCHH motif and is represented in yellow in Fig. 1. The most conserved amino acid motifs and the  
379 highest-scoring PFAM/CD domain matches are also shown. The asterisks on the *Physarum\_Pp1* model  
380 represent in-frame stop codons, which may indicate the presence of an undetected intron. Note the  
381 *Physarum\_Pp1* EN-like domain is also reduced and weakly conserved (Fig. 3A). The dark gray line in  
382 *PLE-X1\_sTam* represents an intron that was inferred from *S. moellendorffii* annotated gene models.  
383

384 second motif with several well-conserved C and H aa (*Chlamys-1\_cBra*, Fig. 6).  
385 Josephin-like cysteine protease domains are present in *Dualen* non-LTR elements,  
386 where they may play a role in disrupting protein degradation (Kojima and Fujiwara  
387 2005). The second type included an upstream ORF encoding a peptide with a gag-like  
388 zinc-knuckle domain (zf-CCHC, *Chlamys-2\_cBra*, Fig. 6). The third type was notable  
389 since related elements were also identified in spike mosses, and a small number of  
390 highly significant BLASTp results were recovered from moss species, potentially  
391 indicating a wider distribution in “early-diverging” plants. These families include the CxC  
392 motif but lack the GIY-YIG EN, with a unique N-terminal extension that is likely  
393 separated by an intron and includes a conserved CxCX<sub>1-8</sub>C motif (*PLE-X1\_sTam*, Fig.  
394 6). The families in *C. braunii* appeared to have genome-wide distributions, and

395 remarkably, the two spike moss families exhibited targeted insertions at a precise  
396 location within 28S ribosomal RNA genes. The insertion target differed by only 4 bp  
397 between the families (Fig. S5), suggesting deep conservation of the target sequence at  
398 least since the divergence of *S. moellendorffii* and *S. tamariscina* ~300 Mya (Xu, et al.  
399 2018). Metazoan ribosomal DNA is a well-documented insertion niche for *R* element  
400 non-LTRs and the *piggyBac* DNA transposon *Pokey* (Eickbush and Eickbush 2007),  
401 although to our knowledge this is the first example from both plants and PLEs. It  
402 remains to be seen how this group achieve either genome-wide or targeted ribosomal  
403 DNA insertion without an identified EN. Interestingly, these families form a well-  
404 supported clade with the EN+ family from *P. polycephalum* (*Chlamys-1\_pPol*, Fig. 5A),  
405 potentially indicating secondary loss of the GIY-YIG EN.

406

#### 407 ***Functional characterization of an active Chlamys element***

408

409 As high-quality functional data is available for *C. reinhardtii*, we further focused on the  
410 10 *Chlamys* families curated in this species. Notably, we also identified putatively  
411 nonautonomous *Chlamys* elements, which produced pLTRs (and often multi-copy head-  
412 to-tail insertions) and generally exhibited sequence similarity to autonomous families at  
413 their 3' ends. The nonautonomous elements include *MRC1*, which was previously  
414 described as a nonautonomous LTR (Kim, et al. 2006) and may be the most active TE  
415 in *C. reinhardtii* laboratory strains (Neupert, et al. 2020). Further supporting recent  
416 activity, *Chlamys* copies exhibited minimal divergence from their respective consensus  
417 sequences (Fig. S6) and within-species polymorphic insertions were observed for  
418 copies of all 10 autonomous families by comparison to a newly assembled PacBio-  
419 based genome of the divergent field isolate CC-2931 (Supp. note). Cumulatively,  
420 *Chlamys* PLEs spanned ~1.6% of the 111 Mb *C. reinhardtii* genome and comprised  
421 ~15% of the total TE sequence.

422

423 Only one active C-terminal EN+ PLE has been experimentally characterized, the  
424 archetypal *Penelope* of *D. virilis* (Pyatkov, et al. 2004; Schostak, et al. 2008). In an  
425 attempt to characterize a *Chlamys* element, we searched for an actively transcribed

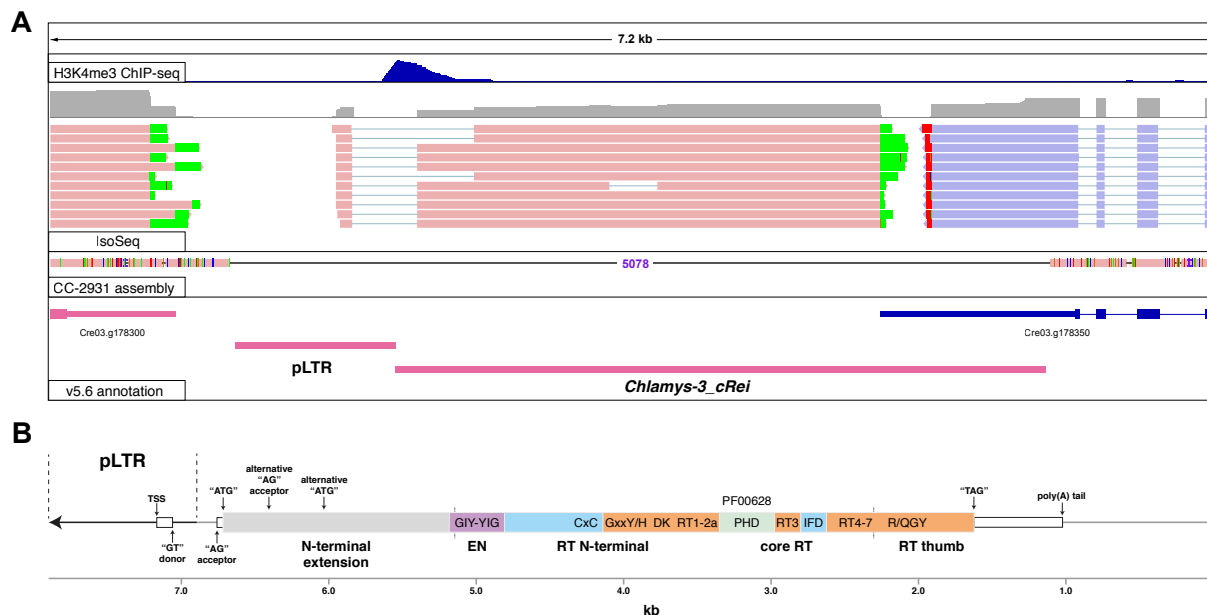

426  
 427 **Fig. 7.** Functional characterization of an active *Chlamys* element in *C. reinhardtii*. **(A)** IGV browser view  
 428 (Robinson, et al. 2011) of a *Chlamys-3\_cRei* copy that is polymorphic between the reference genome and  
 429 the divergent field isolate CC-2931. Green and red mismatched bases on Iso-Seq reads represent  
 430 poly(A) tails of transcripts. Forward strand reads and gene/repeat models are shown in pink, and reverse  
 431 strand in blue. **(B)** Schematic of the inferred gene model and structural organization of *Chlamys-3\_cRei*.  
 432 Note that this represents the full-length element and the transcribed copy above contains a 2.84 kb  
 433 internal deletion, the boundaries of which are shown by the dashed black lines. Domains are colored as in  
 434 Fig. 6 and conserved motifs are textually represented as shown for *Chlamys-1\_meVir* in that figure.

435  
 436 copy using recent PacBio RNA-seq (i.e. Iso-Seq) and H3K4me3 ChIP-seq datasets  
 437 (Gallaher, et al. 2021), with the H3K4me3 modification reliably marking active promoters  
 438 in *C. reinhardtii* (Ngan, et al. 2015). Due to frequent 5' truncation, only two families were  
 439 found with full-length copies, and transcription was observed for only a single copy of  
 440 the *Chlamys-3\_cRei* family (Fig. 7A). Unfortunately, this copy features a 2.8 kb deletion,  
 441 although this is entirely within the ORF and the copy presumably retains a functional  
 442 promoter, transcription start site (TSS) and terminator. Strikingly, the derived gene  
 443 model of *Chlamys-3\_cRei* (Fig. 7B) shared several features with *Penelope*, in which the  
 444 pLTR harbors the TSS and a 75 bp intron within the 5' UTR that overlaps the internal  
 445 promoter (Arkhipova, et al. 2003; Schostak, et al. 2008). In *Chlamys-3\_cRei*, the TSS is  
 446 also located in the pLTR and a 398 bp intron within the 5' UTR spans the boundary  
 447 between the pLTR and downstream main body. The H3K4me3 ChIP-seq supports an

448 internal promoter coinciding with the intron. Additionally, three Iso-Seq reads supported  
449 an alternative isoform with a 751 bp intron. This isoform initiates at a downstream start  
450 codon and results in a peptide truncated by 293 aa, although as the predicted *Chlamys-*  
451 *3\_cRei* peptide includes an N-terminal extension both isoforms encode complete EN  
452 and RT domains. The similarities between *Penelope* and *Chlamys-3\_cRei* potentially  
453 indicate an ancient and deeply conserved organization and perhaps mechanism shared  
454 by canonical PLEs and the N-terminal EN+ PLEs described herein.

455

### 456 ***Hydra: A novel C-terminal EN+ clade***

457

458 While performing an updated phylogenetic analysis of all PLEs (see below), we noticed  
459 that seven C-terminal EN+ families in Repbase formed an isolated group highly  
460 divergent from *Neptune*, *Penelope/Poseidon* and *Nematis*. All but one of these families  
461 were annotated from the freshwater polyp *Hydra magnipapillata*. Using protein  
462 homology searches, we identified a small number of additional families in other aquatic  
463 invertebrates spanning four phyla (Cnidaria, Mollusca, Echinodermata, and Arthropoda),  
464 notably in species such as the stony coral *Acropora millepora* and the sea cucumber  
465 *Apostichopus japonicus*. These elements were generally short (<3 kb) and contained  
466 single ORFs encoding peptides with several similarities to canonical C-terminal EN+  
467 PLEs, i.e. no CxC motif, no IFD and a C-terminal GIY-YIG EN (Fig. S7). HHRs were  
468 also detected, strengthening the relationship with canonical PLEs. However, these  
469 families also exhibited unique features. The N-terminal GxKF/Y motif was not well  
470 conserved, the DKG motif was modified to DKT, and RT4(B) was particularly divergent  
471 and challenging to align. Most notably, in the EN domain the CCHH motif universal to C-  
472 terminal EN+ PLEs (and *Naiads*) was absent (Fig. S2, S7). A linker domain was present  
473 which was most similar to that of *Nematis*, although the CX<sub>2-5</sub>CxxC Zn-finger was  
474 modified to a CxCX<sub>5</sub>C motif. Interestingly, all families exhibited insertions into (TA)<sub>n</sub>,  
475 strengthening the association between the linker domain and targeted insertion. We  
476 name this new clade of C-terminal EN+ PLEs *Hydra*, in line with both their aquatic hosts  
477 and their discovery in *H. magnipapillata*.

478

## 479 ***Evolution of the RT and GIY-YIG EN domains***

480

481 As seen in Fig. 5, the newly discovered types of PLE span much of the well-sequenced  
482 taxonomic diversity in Eukarya, including protists, plants, and animals. We placed  
483 *Naiad*, *Chlamys* and *Hydra* representatives into a reference PLE dataset that included  
484 the previously known EN+ *Penelope/Poseidon*, *Neptune*, *Nematis* and EN– *Athena* and  
485 *Coprina* clades, as well as representatives of the sister clade to PLEs, the TERTs  
486 (Arkhipova 2006; Gladyshev and Arkhipova 2007). The combined phylogeny of the  
487 extended core RT domain, which also includes the RT thumb and the previously  
488 identified N-terminal conserved motifs N1-N3 (Arkhipova 2006), is presented in Fig. 8.  
489 With the exception of *Neptune*, all of the above clades were recovered with ultrafast  
490 bootstrap support values >90%. The monophyly of *Neptune* was not recovered, with  
491 *Neptune* elements forming a paraphyletic group in a weakly supported clade with the  
492 taxonomically diverse EN– *Coprina* elements, as also occurred in a previous analysis  
493 (Arkhipova, et al. 2017). The novel N-terminal EN+ elements (i.e. *Naiad* + *Chlamys*)  
494 formed a strongly supported clade, although *Chlamys* was paraphyletic with respect to  
495 the *Naiad* clade and the internal topologies of the more structurally diverse *Chlamys*  
496 elements were not well supported. Despite its potential paraphyly, we still consider  
497 *Chlamys* to be a useful grouping given its unique structural features. The rotifer-specific  
498 EN– *Athena* elements formed the most basal PLE clade when rooting the phylogeny on  
499 TERTs, although the deep branches linking the major PLE clades generally received  
500 weak support. As seen in both *Chlamys* and *Neptune*, EN– families occasionally  
501 emerge within EN+ clades, apparently as a result of EN loss accompanied by  
502 acquisition of an alternative way of employing accessible 3'-OH ends for RT priming.  
503 Overall, it is evident that, with inclusion of the hitherto unknown superfamilies, PLE RTs  
504 display an astonishing level of clade diversity, which is comparable to that of non-LTR  
505 and LTR retrotransposon RTs, and will undoubtedly increase in line with the number of  
506 sequenced genomes from under-represented eukaryotic branches of the tree of life.

507

508

509

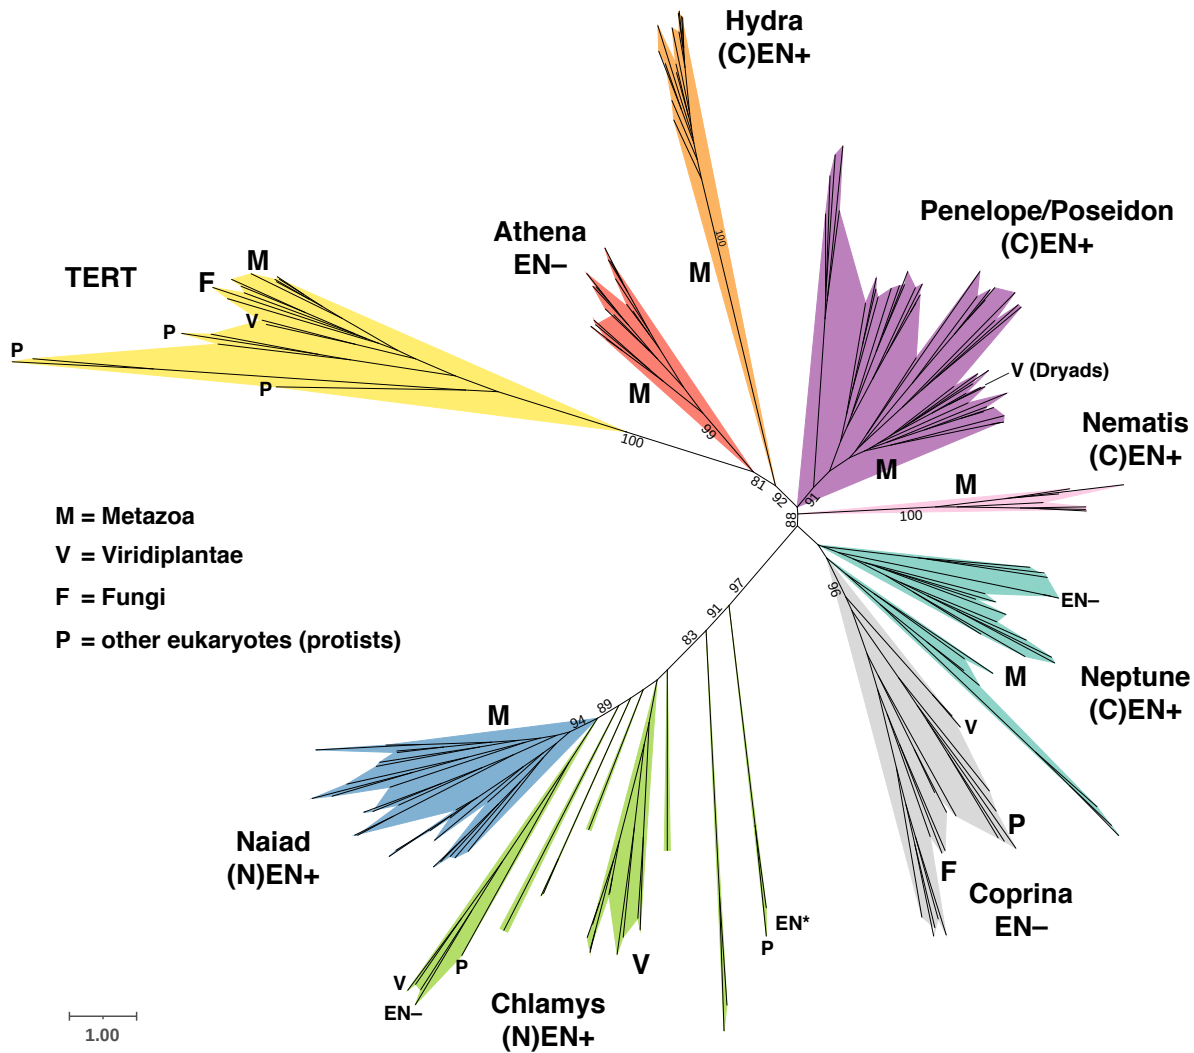

510

511

512 **Fig. 8.** Core RT maximum likelihood phylogeny of PLE RTs and TERTs. Support values from 1000  
 513 ultrafast bootstrap replications are shown, with all values from nodes within major clades (colored) and  
 514 any values <70 at deeper nodes excluded to aid visualization. The taxonomic range of clades and  
 515 subclades is shown by letters. Note that the “V” marking the “*Dryad*” subclade within *Penelope/Poseidon*  
 516 points at three conifer families from the presumed horizontal transfer event (Lin, et al. 2016). The location  
 517 of EN in EN+ groups is provided by the prefixes (N) and (C) for N-terminal and C-terminal, respectively.  
 518 Subclades with EN remnants or no EN that are within EN+ clades are shown by EN\* and EN– tags,  
 519 respectively. Scale bar, aa substitutions per site. The phylogeny was annotated using iTOL (Letunic and  
 520 Bork 2019).

521

522



523 In light of the increased diversity uncovered by *Naiad*, *Chlamys* and *Hydra* PLEs, we  
524 also attempted to further elucidate the evolutionary relationships of the GIY-YIG EN  
525 domain. Since the domain is too short for conventional phylogenetic analysis, it has  
526 previously been analyzed using protein clustering approaches. Dunin-Horkawicz, et al.  
527 (2006) found that the most similar ENs to those from canonical C-terminal EN+ PLEs  
528 belonged to the HE\_Tlr8p\_PBC-V\_like group (cd10443), which includes homing ENs  
529 from bacteria, chloroviruses (e.g. *Paramecium bursaria* chlorella virus 1, PBCV-1) and  
530 iridoviruses, as well as an EN from the *Tlr8* Maverick/Polinton element from  
531 *Tetrahymena thermophila*. Using CLANS (Frickey and Lupas 2004), we performed an  
532 updated clustering analysis with all available PLE ENs (Fig. S8). *Neptune*, *Nematis* and  
533 *Penelope/Poseidon* ENs formed distinct although strongly connected clusters, with  
534 *Naiad* ENs essentially indistinguishable from *Neptune*. These results largely follow  
535 expectations from the shared presence of the CCHH motif and the presence/absence of  
536 the CX<sub>2-5</sub>CxxC Zn-finger linker (Fig. S2), and these domains are collectively  
537 representative of the canonical PLE EN described in NCBI (cd10442). *Hydra* ENs  
538 formed a distinct and well-resolved cluster that was nonetheless related to other PLE  
539 ENs, in line with the absence of the CCHH motif and the alternative configuration of the  
540 linker motif. Interestingly, the ENs sometimes associated with the giant *Terminons* (Fig.  
541 1), which contain RTs from the otherwise EN- *Athena* group (Arkhipova, et al. 2017),  
542 were also recovered as a distinct cluster related to other PLE ENs. These ENs include  
543 both the CX<sub>2-5</sub>CxxC and CCHH motifs, suggesting shared ancestry with EN+ PLEs,  
544 although they also contain large unique insertions (Fig. S2). Finally, the *Chlamys* ENs  
545 were diffusely clustered between all other PLE ENs and several ENs from the  
546 HE\_Tlr8p\_PBC-V\_like group. The lack of strong clustering can likely be explained by  
547 the lack of both the CX<sub>2-5</sub>CxxC and CCHH motifs resulting in fewer conserved sites, and  
548 the possible link between *Chlamys* and HE\_Tlr8p\_PBC-V\_like ENs should be  
549 interpreted tentatively. Overall, the GIY-YIG ENs of all PLEs appear to be related, and  
550 in line with the results of Dunin-Horkawicz, et al. (2006), PLE ENs are most similar to  
551 particular homing ENs from bacteria and viruses.

552

553



554 **DISCUSSION**

555

556 ***A new major PLE clade with N-terminal EN and its impact on genome and***  
557 ***transposon annotation***

558

559 *Penelope*-like elements are arguably the most enigmatic type of retrotransposable  
560 elements inhabiting eukaryotic genomes. Due to their absence from the best-studied  
561 genomes such as mammals, birds and angiosperms, and the complex tandem/inverted  
562 structures brought about by still undefined features of their peculiar transposition cycle,  
563 PLEs have largely been neglected and overlooked by most computational pipelines  
564 used in comparative genomics. Current approaches distinguish PLEs by the presence  
565 of a PLE-related RT, and classify them to the “order” level as a clade of non-LTR  
566 elements (Bao, et al. 2015) without subdivision into groups differing by domain  
567 architecture and phylogenetic placement, as is commonly done for non-LTR (LINE) and  
568 LTR retrotransposons (Storer, et al. 2021). Here we show that the degree of PLE  
569 structural and phylogenetic diversity matches that of non-LTR and LTR  
570 retrotransposons, emphasizing the need for updating current classification schemes and  
571 TE-processing computational pipelines.

572

573 Our data also underscore the need to adjust computational pipelines to incorporate  
574 searches for GIY-YIG EN either upstream or downstream from PLE RT, due to the high  
575 degree of polymorphisms (especially frameshifts) in the connector region, which  
576 complicates identification of full-length elements. This is especially relevant at a time  
577 when increasing numbers of invertebrate genomes are being sequenced, with *Naiad*  
578 elements often contributing tens of thousands of copies to metazoan genomic DNA.  
579 Under-annotation of poorly recognizable TEs poses a serious problem to gene  
580 annotation. This is especially well-illustrated in host-associated and environmental  
581 metagenome analyses, where understudied eukaryotic TEs become mis-assigned to  
582 bacterial genomes and are propagated in taxonomy-aware reference databases,  
583 jeopardizing future automated annotations (Arkhipova 2020).

584 Of special interest is the dominance of *Chlamys* PLEs in the plant kingdom, where their  
585 ancient nature is supported by their presence in the most basal members of the green  
586 lineage, by a high degree of divergence between *Chlamys* elements, and by distinctive  
587 features of the associated EN. In contrast to the documented case of horizontal transfer  
588 of a canonical C-terminal EN+ PLE into conifer genomes (Lin, et al. 2016), their early-  
589 branching position in the PLE phylogeny argues that they constitute ancestral genome  
590 components in early-branching plants and green algae, and does not support recent  
591 introduction. Nevertheless, their ongoing activity and diversification in *Chlamydomonas*  
592 indicates that *Chlamys* elements are actively participating in algal genome evolution.

593

### 594 ***Common and distinctive features of Naiad and Chlamys retrotransposition***

595

596 Consistent association of all PLE RTs with a special type of endonuclease/nickase  
597 (GIY-YIG EN), which may have occurred several times in early eukaryotic evolution to  
598 form distinct lineages characterized by N- or C-terminal EN domains, underscores the  
599 importance of this EN for efficient intragenomic proliferation mediated by PLE RT, and  
600 emphasizes the need for further mechanistic investigations of the non-trivial PLE  
601 transposition cycle in representatives of each PLE lineage. It is very likely that the  
602 unique EN cleavage properties determine the formation of complex tandem/inverted  
603 pLTRs and the “tail” extension on either side of PLEs, not observed during TPRT of  
604 non-LTR elements, but seen in *Naiad/Chlamys*.

605

606 Further, PLEs are highly unusual among retroelements in their ability to retain introns  
607 after retrotransposition, sometimes even retrotransposing intron-containing host genes  
608 *in trans* (Arkhipova, et al. 2003; Arkhipova, et al. 2013). While most of the  
609 *Naiad/Chlamys* ORFs are not interrupted by introns, the functionally characterized  
610 active *Chlamys-3\_cRei* element shares an intron position within the 5'-UTR with the  
611 functionally studied *Penelope* from *D. virilis*, overlapping with the internal promoter  
612 (Schostak, et al. 2008). This suggests that other PLEs may share this organization and  
613 harbor introns upstream of the main ORF. The significance of intron retention is

614 unknown, although it is likely a consequence of the unusual retrotransposition  
615 mechanism.

616  
617 Interestingly, we did not detect HHR motifs in *Naiad* or *Chlamys* elements, except for  
618 *Chlamys-2\_cBra* (EN+) and *PLE-X1\_cBra* (EN-). These two families from *C. braunii* are  
619 not closely related (Fig. 5A), implying HHRs may have been independently acquired or  
620 frequently lost from other *Chlamys*. Conversely, HHRs are universally present in the  
621 *Hydra* clade and other PLEs. HHR function in EN+ PLEs is still unclear, and while they  
622 have been hypothesized to help cleave the tandemly arranged long precursor RNAs  
623 (Cervera and De la Peña 2014), their absence from *Naiads* and most *Chlamys*  
624 elements obviously does not interfere with their successful intragenomic proliferation.

625  
626 In many cases, it was not possible to discern target-site duplications in *Naiads* and  
627 *Chlamys* due to a strong insertion bias towards microsatellite repeats, with (CA)<sub>n</sub> most  
628 commonly observed in *Chlamys* and (TA)<sub>n</sub> in *Naiads*. The CX<sub>2-5</sub>CxxC EN linker was  
629 hypothesized to mediate such bias in *Neptune* PLEs (Arkhipova 2006) and could do so  
630 in *Naiads*, but its absence from *Chlamys* suggests that the novel CxC domain may also  
631 play a role in targeting EN activity to specific DNA repeats. Also of interest are the EN-  
632 “*PLE-X*” families from two species of spike moss, which are the first known TEs to  
633 exhibit targeted insertion into the 28S ribosomal RNA gene in plants, as is observed in  
634 certain non-LTRs and DNA transposons of arthropods and other animals (Eickbush  
635 2002; Penton and Crease 2004; Gladyshev and Arkhipova 2009).

636  
637 Finally, it is unknown what role the IFD may play in *Naiads* and *Chlamys*. In TERTs, the  
638 IFD aids the stabilization of telomerase RNA (TER) and DNA during the extension of  
639 telomeric DNA (Jiang, et al. 2018). The IFD domain in *Naiads* and *Chlamys* is shorter  
640 than that of TERTs, and its loss from a specific *Naiad* subclade demonstrates that it is  
641 not necessarily a functional requirement.

642  
643 Establishment of an *in vitro* system to study PLE retrotransposition mechanisms would  
644 be the next important task required to achieve full understanding of PLE-specific TPRT

645 features that distinguish them from LINEs, such as formation of complex  
646 tandem/inverted repeat structures and microsatellite insertion bias.

647

### 648 ***Naiad selenoproteins***

649

650 The *Naiads* that encode selenoproteins are notable for two reasons. First, almost all  
651 described selenoproteins include a single Sec, whereas the *Naiads* contain either three  
652 or four. Baclaocos, et al. (2019) performed analysis of selenoprotein P (SelP), one of  
653 the few selenoproteins including multiple Sec residues, finding that in bivalves SelP  
654 contains the most Sec residues of any metazoan group, and that spider SelP proteins  
655 contain a moderate number of Sec residues. Bivalves in particular are known for their  
656 high selenium content (Bryszewska and Måge 2015), and it may be that the *Naiads*  
657 represent cases of TEs adapting to their host cellular environments. However, even in  
658 bivalves selenoproteins are incredibly rare (e.g. the pacific oyster selenoproteome  
659 encompasses 32 genes (Baclaocos, et al. 2019)), suggesting a more specific role for  
660 the incorporation of Sec in these families. Sec residues are involved in numerous  
661 physiological processes and are generally found at catalytic sites, where in many cases  
662 they have a catalytic advantage relative to cysteine (Labunskyy, et al. 2014). All but one  
663 of the Sec residues in *Naiad* peptides correspond to highly conserved sites in the CX<sub>2</sub>-  
664 <sub>5</sub>CxxC Zn-finger, CCHH Zn-finger and the DKA motif, and although the precise  
665 physiological role of these motifs in PLEs is unknown, it may be that the incorporation of  
666 Sec provides both a catalytic and evolutionary advantage.

667

668 Second, the *Naiad* families are the first described selenoprotein-encoding TEs. It is  
669 currently unclear whether these represent highly unusual cases, although the fact that  
670 they appear to have evolved independently in spiders and clams hints that other  
671 examples may be found in the future. This has potential implications for TE annotation  
672 in general, and selenoprotein-encoding TEs may have previously been overlooked in  
673 taxa such as bivalves because of apparent stop codons. Additionally, this result may  
674 provide insight into evolution of new selenoproteins. The transition from encoding Cys to  
675 Sec is expected to be a complex evolutionary process, since a gene must acquire a

676 SECIS element and near-simultaneously undergo a mutation from TGT/TGC (encoding  
677 Cys) to TGA (Castellano, et al. 2004). The insertion of TEs carrying SECIS elements  
678 into the 3' UTRs of genes could provide a pathway for SECIS acquisition, especially for  
679 TEs that undergo 5' truncation and may insert with little additional sequence. It remains  
680 to be seen if the selenoprotein-encoding *Naiads*, or indeed any other TEs, have  
681 contributed to the evolution of new selenoproteins in their host genomes.

682

### 683 ***Evolutionary implications for PLE origin and diversification***

684

685 As the branching order of major PLE clades diverging from TERTs is not exceptionally  
686 robust, it may be difficult to reconstitute evolutionary scenarios which were playing out  
687 during early eukaryogenesis. It is possible that an ancestral EN- PLE, similar to *Athena*  
688 or *Coprina* but lacking the extended N-terminus, was present at telomeres (Gladyshev  
689 and Arkhipova 2007) before undergoing either multiple domain fusions to give rise to  
690 TERTs, or fusions with GIY-YIG EN, either at the N- or at the C-termini, to form the  
691 contemporary *Naiad/Chlamys*, *Neptune*, *Nematis*, and *Penelope/Poseidon*  
692 superfamilies capable of intrachromosomal proliferation.

693

694 There are several plausible evolutionary scenarios that could explain the observed EN  
695 and RT diversity, and ENs may have been acquired or exchanged several times by  
696 different PLE clades. It is possible that *Chlamys* elements acquired an EN without the  
697 CX<sub>2-5</sub>CxxC and CCHH motifs from a homing EN from the HE\_Tlr8p\_PBC-V\_like family,  
698 and that the Zn-finger motifs were later gained by *Naiads*. ENs with both Zn-fingers  
699 could then have been transferred from *Naiads* to the C-termini of EN- animal PLEs  
700 (once or multiple times), giving rise to other EN+ clades. This scenario would imply that  
701 the internal CCHH was then lost in *Hydra*, and the upstream linker domain was either  
702 reduced (*Nematis*), reduced and modified (*Hydra*) or lost (*Penelope/Poseidon*).

703 Alternatively, an EN containing one or both Zn-fingers could have been independently  
704 acquired by C-terminal EN+ PLEs (again once or multiple times) and exchanged with  
705 *Naiads* replacing the *Chlamys*-like EN (or gained independently by *Naiads* from a  
706 similar homing EN). This scenario would imply the existence of homing ENs with Zn-

707 finger motifs, which have not been found, however both the CX<sub>2-5</sub>CxxC and CCHH  
708 motifs are present in the stand-alone ENs occasionally associated with *Terminons*. EN  
709 acquisition, either at the N- or C-terminus, may have been facilitated if RT and EN were  
710 brought in proximity either on a carrier virus or on a chimeric circular replicon allowing  
711 permutation. Any combination of events in the above scenarios could of course explain  
712 the observed diversity. Notably, early metazoans such as cnidarians exhibit the highest  
713 PLE clade diversity, with *Poseidon*, *Naiad* and *Hydra* present in *H. magnipapillata* and  
714 *Neptune*, *Naiad* and *Hydra* in the coral *A. millepora*, implying that the appropriate  
715 conditions existed for either multiple exchanges or acquisitions of ENs. Finally, EN  
716 losses are not unusual, and EN<sup>-</sup> elements can emerge within EN<sup>+</sup> clades, as in  
717 *Chlamys* PLE-X families in *Selaginella* and *Chara*, or the *Neptune*-like *MjPLE01* from  
718 the kuruma shrimp *Marsupenaeus japonicus* (Koyama, et al. 2013), if they adopt  
719 alternative means of securing 3'-OH groups for TPRT.

720

721 While the IFD domain may have been inherited by *Naiads/Chlamys* from a common  
722 ancestor with TERTs, IFD-like regions are also found sporadically in *Coprina* elements,  
723 arguing against its use as a synapomorphy. It is possible that the IFD has been lost  
724 multiple times in different PLE clades, as demonstrated by its loss in some *Naiads*, or  
725 gained independently in *Naiads/Chlamys* and *Coprina*. The presence/absence of HHR  
726 motifs does not provide many clues either: while found in only two basal *Chlamys*-like  
727 elements and absent from *Naiads*, they are present in all other PLEs, both EN<sup>+</sup> and  
728 EN<sup>-</sup>. As with newly described retrozymes, they may exploit autonomous PLEs for their  
729 proliferation (Cervera and de la Peña 2020), or they could provide an unknown function.

730

731 Regardless of the exact sequence of events which led to PLE diversification in early  
732 eukaryotic evolution, it is now clear that the diversity of PLE structural organization,  
733 manifested in the existence of at least seven deep-branching clades (superfamilies)  
734 differing by domain architecture and found in genomes of protists, fungi, green and red  
735 algae, plants, and metazoans from nearly every major invertebrate and vertebrate  
736 phylum, can no longer be overlooked and should be reflected in modern genomic  
737 analysis tools. As more genomes from neglected and phylogenetically diverse lineages



738 become available, it is likely that the diversity of PLEs will continue to expand, further  
739 supporting their increasingly important and unique position in TE biology and their  
740 contribution to shaping the amazing diversity of eukaryotic genomes.

741

## 742 **MATERIALS AND METHODS**

743

### 744 ***Annotation and curation of PLE consensus sequences***

745

746 For general TE identification and annotation in metazoan genome assemblies (*D.*  
747 *stevensoni*, *P. laevis*), we used TEdenovo from the REPET package (Flutre, et al. 2011)  
748 to build *de novo* repeat libraries with default parameters. Although REPET-derived *de*  
749 *nov* TE consensus sequences are automatically classified under Wicker's scheme  
750 (Wicker, et al. 2007), we additionally used RepeatMasker v4.1.0 (Smit, et al. 2015) for  
751 TE classification, detection and divergence plot building, using the initial TEdenovo  
752 repeat library. To specifically illustrate the composition on PLE families in the *P. laevis*  
753 genome, we used the corresponding consensus sequences of PLE families as a local  
754 library for divergence plot building.

755

756 Initial *Chlamys* consensus sequences from *C. reinhardtii* and its close relatives  
757 (*Chlamydomonas incerta*, *Chlamydomonas schloesseri* and *Edaphochlamys*  
758 *debaryana*) were curated as part of a wider annotation of TEs in these species (Craig  
759 2021; Craig, et al. 2021). Inferred protein sequences from the metazoan and algal  
760 consensus models were then used as PSI-BLAST or tBLASTn (Camacho, et al. 2009)  
761 queries to identify related *Naiad* and *Chlamys* PLEs in other species. PSI-BLAST was  
762 run using NCBI servers to identify putative PLE proteins that had been deposited in  
763 NCBI. tBLASTn was performed against all eukaryotic genome assemblies accessed  
764 from NCBI on 2020/04/09. Assemblies with multiple significant hits were selected for  
765 further curation, and where several related species had multiple hits the most  
766 contiguous assemblies were targeted. A Perl script was used to collect the nucleotide  
767 sequence of each tBLASTn hit from a given assembly, and the most abundant putative  
768 PLEs in each species were subjected to manual curation. This was performed by



769 retrieving multiple copies by BLASTn, extending the flanks of each copy and aligning  
770 the subsequent sequences with MAFFT v7.273 (Kato and Standley 2013). The  
771 multiple sequence alignment of each family was then visualized and manually curated  
772 (removing poorly aligned copies, identifying 3' termini and pLTRs if present, etc.).  
773 Consensus sequences were produced for each family and protein sequences were  
774 inferred by identifying the longest ORF.

775  
776 Copy number was estimated by performing BLASTn against the assembly using the  
777 consensus sequence as a query. NCBI BLASTn optimized for highly similar sequences  
778 (megablast) was used with cutoff E-value 1e-5. Whole-genome shotgun (wgs) datasets  
779 were used for each species, with the best quality assembly used in case of multiple  
780 isolates. In most cases, NCBI web interface was used to control for truncated and  
781 deleted copies via graphical summary. If the maximum number of target sequences  
782 (5000) was exceeded, wgs datasets were created using blastn\_vdb from the SRA  
783 Toolkit and searched with blastn 2.6.1+, or installed locally and searched with blastn  
784 2.10.1+.

785  
786 Novel *Hydra* families were identified and curated using the same approach as above.  
787 Existing protein sequences from *H. magnipapillata* PLEs accessed from Repbase were  
788 used as initial queries to search for related elements, alignments of which were then  
789 manually curated and used to produce consensus sequences.

790

### 791 ***Functional motif identification***

792

793 SECIS elements were identified in *Naiad* consensus sequences containing in-frame  
794 UGA codons using the SECISearch3 (Mariotti, et al. 2013) online server  
795 (<http://gladyshevlab.org/SelenoproteinPredictionServer/>).

796

797 Hammerhead ribozyme motif (HHR) motif searches were performed using secondary  
798 structure-based software RNAmotif (Macke, et al. 2001). A general HHR descriptor  
799 (Cervera and De la Peña 2014) was used to detect HHR motifs in *Naiad/Chlamys* and

800 *Hydra* elements. More relaxed descriptors were also employed as in Arkhipova, et al.  
801 (2017) to accommodate different helices with longer loops and stem mispairing and  
802 more relaxed cores with mismatches, and with and without the presence of Helix III,  
803 however it did not result in additional HHR motif detection.

804

### 805 ***Functional characterization of Chlamys elements in Chlamydomonas reinhardtii***

806

807 The divergence landscape (Fig. S6) and total abundance of *Chlamys* elements in *C.*  
808 *reinhardtii* were calculated using RepeatMasker v4.0.9 (Smit, et al. 2015) and the  
809 highly-contiguous assembly of strain CC-1690 (O'Donnell, et al. 2020). The functional  
810 characterization represented in Fig. 7 was performed using the standard v5 reference  
811 genome. Iso-Seq (accession: PRJNA670202) and H3K4me3 ChIP-seq (accession:  
812 PRJNA681680) data were obtained from Gallaher, et al. (2021). CCS (circular  
813 consensus sequence) Iso-Seq reads were mapped using minimap2 (-ax splice:hq –  
814 secondary no) (Li 2018). Within-species polymorphism was demonstrated by  
815 comparison to a *de novo* PacBio-based assembly of the divergent field isolate CC-2931,  
816 which exhibits ~3% genetic diversity relative to the standard reference strain (Craig, et  
817 al. 2019). The sequencing and assembly of the CC-2931 assembly is described in  
818 Supp. note. The CC-2931 assembly was mapped to the v5 reference using minimap2 (-  
819 ax asm10).

820

### 821 ***RT phylogeny and EN protein clustering analysis***

822

823 Initial amino acid sequence alignments were done with MUSCLE (Edgar 2004), with  
824 secondary structure assessed by inclusion of TERT PDB files (3kyl, 3du5) using  
825 PROMALS3D (Pei, et al. 2008), and were manually adjusted to ensure the presence of  
826 each conserved motif at the proper position. Phylogenetic analysis was done with IQ-  
827 TREE v1.6.11 (Trifinopoulos, et al. 2016), with the best-fit model chosen by  
828 ModelFinder according to Bayesian information criterion, and with 1000 UFBoot  
829 replicates to evaluate branch support.

830 Protein clustering of the GIY-YIG EN domain was performed using CLANS (Frickey and  
831 Lupas 2004). GIY-YIG ENs from all superfamilies annotated at NCBI (cd00719) were  
832 combined with those from PLEs (canonical C-terminal EN+, N-terminal EN+, *Hydra* and  
833 *Terminons*). All ENs were reduced to the core domain spanning from the “GIY” motif to  
834 the conserved N aa, unless a Zn-finger linker domain was present upstream of the  
835 “GIY”, in which case this motif was also included (see Fig. S2). Several very distantly  
836 related EN superfamilies were excluded after a preliminary analysis. CLANS was run  
837 with a p-value threshold of  $1 \times 10^{-8}$  until no further changes were observed in clustering.

838

### 839 **Acknowledgments**

840  
841 This work was supported by the U.S. National Institutes of Health grant R01GM111917  
842 to I.A. R.C. was supported by the Biotechnology and Biological Sciences Research  
843 Council EASTBIO Doctoral Training Partnership and the project received funding from  
844 the European Research Council under the European Union’s Horizon 2020 Research  
845 and Innovation Programme (Grant Agreement no. 694212).

846

847

848

849

850

851

852

853

854

855

856

857

## 858 REFERENCES

859

- 860 Arkhipova IR. 2006. Distribution and phylogeny of *Penelope*-like elements in eukaryotes. *Syst*  
861 *Biol* 55:875-885.
- 862 Arkhipova IR. 2020. Metagenome proteins and database contamination. *mSphere* 5:e00854-  
863 00820.
- 864 Arkhipova IR. 2017. Using bioinformatic and phylogenetic approaches to classify transposable  
865 elements and understand their complex evolutionary histories. *Mob DNA* 8:19.
- 866 Arkhipova IR, Pyatkov KI, Meselson M, Evgen'ev MB. 2003. Retroelements containing introns in  
867 diverse invertebrate taxa. *Nat Genet* 33:123-124.
- 868 Arkhipova IR, Yushenova IA, Rodriguez F. 2013. Endonuclease-containing *Penelope*  
869 retrotransposons in the bdelloid rotifer *Adineta vaga* exhibit unusual structural features and play  
870 a role in expansion of host gene families. *Mob DNA* 4:19.
- 871 Arkhipova IR, Yushenova IA, Rodriguez F. 2017. Giant reverse transcriptase-encoding  
872 transposable elements at telomeres. *Mol Biol Evol* 34:2245-2257.
- 873 Baclaocos J, Santessmasses D, Mariotti M, Bierla K, Vetick MB, Lynch S, McAllen R, Mackrill JJ,  
874 Loughran G, Guigo R, et al. 2019. Processive recoding and metazoan evolution of  
875 selenoprotein P: up to 132 UGAs in molluscs. *J Mol Biol* 431:4381-4407.
- 876 Bao W, Kojima KK, Kohany O. 2015. Repbase Update, a database of repetitive elements in  
877 eukaryotic genomes. *Mob DNA* 6:11.
- 878 Berry MJ, Banu L, Chen YY, Mandel SJ, Kieffer JD, Harney JW, Larsen PR. 1991. Recognition  
879 of UGA as a selenocysteine codon in Type I deiodinase requires sequences in the 3'  
880 untranslated region. *Nature* 353:273-276.
- 881 Böhne A, Zhou Q, Darras A, Schmidt C, Scharl M, Galiana-Arnoux D, Volf JN. 2012.  
882 *Zisupton*—a novel superfamily of DNA transposable elements recently active in fish. *Mol Biol*  
883 *Evol* 29:631-645.
- 884 Bryszewska MA, Måge A. 2015. Determination of selenium and its compounds in marine  
885 organisms. *J Trace Elem Med Biol* 29:91-98.
- 886 Camacho C, Coulouris G, Avagyan V, Ma N, Papadopoulos J, Bealer K, Madden TL. 2009.  
887 BLAST+: architecture and applications. *BMC Bioinformatics* 10:421.
- 888 Castellano S, Novoselov SV, Kryukov GV, Lescure A, Blanco E, Krol A, Gladyshev VN, Guigo  
889 R. 2004. Reconsidering the evolution of eukaryotic selenoproteins: a novel nonmammalian  
890 family with scattered phylogenetic distribution. *EMBO Rep* 5:71-77.
- 891 Cervera A, De la Peña M. 2014. Eukaryotic *Penelope*-like retroelements encode hammerhead  
892 ribozyme motifs. *Mol Biol Evol* 31:2941-2947.
- 893 Cervera A, de la Peña M. 2020. Small circRNAs with self-cleaving ribozymes are highly  
894 expressed in diverse metazoan transcriptomes. *Nucleic Acids Res* 48:5054-5064.
- 895 Craig RJ. 2021. The evolutionary genomics of *Chlamydomonas*. University of Edinburgh.
- 896 Craig RJ, Bondel KB, Arakawa K, Nakada T, Ito T, Bell G, Colegrave N, Keightley PD, Ness  
897 RW. 2019. Patterns of population structure and complex haplotype sharing among field isolates  
898 of the green alga *Chlamydomonas reinhardtii*. *Mol Ecol* 28:3977-3993.
- 899 Craig RJ, Hasan AR, Ness RW, Keightley PD. 2021. Comparative genomics of  
900 *Chlamydomonas*. *Plant Cell* koab026:Online ahead of print.
- 901 Derbyshire V, Kowalski JC, Dansereau JT, Hauer CR, Belfort M. 1997. Two-domain structure of  
902 the td intron-encoded endonuclease I-Tev1 correlates with the two-domain configuration of the  
903 homing site. *J Mol Biol* 265:494-506.
- 904 Dunin-Horkawicz S, Feder M, Bujnicki JM. 2006. Phylogenomic analysis of the GIY-YIG  
905 nuclease superfamily. *Bmc Genomics* 7:98.

- 906 Dupeyron M, Singh KS, Bass C, Hayward A. 2019. Evolution of Mutator transposable elements  
907 across eukaryotic diversity. *Mob DNA* 10:12.
- 908 Edgar RC. 2004. MUSCLE: a multiple sequence alignment method with reduced time and  
909 space complexity. *BMC Bioinformatics*. 5:113.
- 910 Eickbush TH. 2002. R2 and related site-specific non-long terminal repeat retrotransposons.  
911 Washington, DC: ASM Press.
- 912 Eickbush TH, Eickbush DG. 2007. Finely orchestrated movements: evolution of the ribosomal  
913 RNA genes. *Genetics* 175:477-485.
- 914 Evgen'ev MB, Arkhipova IR. 2005. *Penelope*-like elements – a new class of retroelements:  
915 distribution, function and possible evolutionary significance. *Cytogenet Genome Res* 110:510-  
916 521.
- 917 Flutre T, Duprat E, Feuillet C, Quesneville H. 2011. Considering transposable element  
918 diversification in *de novo* annotation approaches. *PLoS One* 6:e16526.
- 919 Frickey T, Lupas A. 2004. CLANS: a Java application for visualizing protein families based on  
920 pairwise similarity. *Bioinformatics* 20:3702-3704.
- 921 Gabler F, Nam S-Z, Till S, Mirdita M, Steinegger M, Söding J, Lupas AN, Alva V. 2020. Protein  
922 sequence analysis using the MPI bioinformatics toolkit. *Current Protocols in Bioinformatics*  
923 72:e108.
- 924 Gallaher SD, Craig RJ, Ganesan I, Purvine SO, McCorkle S, Grimwood J, Strenkert D, Davidi L,  
925 Roth MS, Jeffers TL, et al. 2021. Widespread polycistronic gene expression in green algae.  
926 *Proc Natl Acad Sci U S A* 118:e2017714118.
- 927 Gladyshev EA, Arkhipova IR. 2009. Rotifer rDNA-specific R9 retrotransposable elements  
928 generate an exceptionally long target site duplication upon insertion. *Gene* 448:145-150.
- 929 Gladyshev EA, Arkhipova IR. 2007. Telomere-associated endonuclease-deficient *Penelope*-like  
930 retroelements in diverse eukaryotes. *Proc Natl Acad Sci U S A* 104:9352-9357.
- 931 Jiang J, Wang Y, Sušac L, Chan H, Basu R, Zhou ZH, Feigon J. 2018. Structure of telomerase  
932 with telomeric DNA. *Cell* 173:1179-1190.e1113.
- 933 Kapitonov VV, Jurka J. 2003. The esterase and PHD domains in CR1-like non-LTR  
934 retrotransposons. *Mol Biol Evol* 20:38-46.
- 935 Katoh K, Standley DM. 2013. MAFFT multiple sequence alignment software version 7:  
936 improvements in performance and usability. *Mol Biol Evol* 30:772-780.
- 937 Kim KS, Kustu S, Inwood W. 2006. Natural history of transposition in the green alga  
938 *Chlamydomonas reinhardtii*: Use of the AMT4 locus as an experimental system. *Genetics*  
939 173:2005-2019.
- 940 Kojima KK, Fujiwara H. 2005. An extraordinary retrotransposon family encoding dual  
941 endonucleases. *Genome Research* 15:1106-1117.
- 942 Koyama T, Kondo H, Aoki T, Hirono I. 2013. Identification of two *Penelope*-like elements with  
943 different structures and chromosome localization in kuruma shrimp genome. *Mar Biotechnol*  
944 (NY) 15:115-123.
- 945 Labunskyy VM, Hatfield DL, Gladyshev VN. 2014. Selenoproteins: molecular pathways and  
946 physiological roles. *Physiological Reviews* 94:739-777.
- 947 Letunic I, Bork P. 2019. Interactive Tree Of Life (iTOL) v4: recent updates and new  
948 developments. *Nucleic Acids Res* 47:W256-W259.
- 949 Letunic I, Khedkar S, Bork P. 2020. SMART: recent updates, new developments and status in  
950 2020. *Nucleic Acids Research* 49:D458-D460.
- 951 Li H. 2018. Minimap2: pairwise alignment for nucleotide sequences. *Bioinformatics* 34:3094-  
952 3100.
- 953 Lin X, Faridi N, Casola C. 2016. An ancient transkingdom horizontal transfer of *Penelope*-like  
954 retroelements from arthropods to conifers. *Genome Biol Evol* 8:1252-1266.
- 955 Lingner J, Hughes TR, Shevchenko A, Mann M, Lundblad V, Cech TR. 1997. Reverse  
956 transcriptase motifs in the catalytic subunit of telomerase. *Science* 276:561-567.



- 957 Low SC, Berry MJ. 1996. Knowing when not to stop: selenocysteine incorporation in  
958 eukaryotes. *Trends Biochem Sci* 21:203-208.
- 959 Lue NF, Lin YC, Mian IS. 2003. A conserved telomerase motif within the catalytic domain of  
960 telomerase reverse transcriptase is specifically required for repeat addition processivity. *Mol*  
961 *Cell Biol* 23:8440-8449.
- 962 Macke TJ, Ecker DJ, Gutell RR, Gautheret D, Case DA, Sampath R. 2001. RNAMotif, an RNA  
963 secondary structure definition and search algorithm. *Nucleic Acids Research* 29:4724-4735.
- 964 Mariotti M, Lobanov AV, Guigo R, Gladyshev VN. 2013. SECISearch3 and Seblastian: new  
965 tools for prediction of SECIS elements and selenoproteins. *Nucleic Acids Res* 41:e149.
- 966 Mauer K, Hellmann SL, Groth M, Fröbuis AC, Zischler H, Hankeln T, Herlyn H. 2020. The  
967 genome, transcriptome, and proteome of the fish parasite *Pomphorhynchus laevis*  
968 (Acanthocephala). *PLoS One* 15:e0232973.
- 969 Neupert J, Gallaher SD, Lu Y, Strenkert D, Segal N, Barahimipour R, Fitz-Gibbon ST, Schroda  
970 M, Merchant SS, Bock R. 2020. An epigenetic gene silencing pathway selectively acting on  
971 transgenic DNA in the green alga *Chlamydomonas*. *Nat Commun* 11:6269.
- 972 Ngan CY, Wong CH, Choi C, Yoshinaga Y, Louie K, Jia J, Chen C, Bowen B, Cheng H, Leonelli  
973 L, et al. 2015. Lineage-specific chromatin signatures reveal a regulator of lipid metabolism in  
974 microalgae. *Nat Plants* 1:15107.
- 975 Nishiyama T, Sakayama H, de Vries J, Buschmann H, Saint-Marcoux D, Ullrich KK, Haas FB,  
976 Vanderstraeten L, Becker D, Lang D, et al. 2018. The *Chara* genome: secondary complexity  
977 and implications for plant terrestrialization. *Cell* 174:448-464 e424.
- 978 Nowell RW, Wilson CG, Almeida P, Schiffer PH, Fontaneto D, Becks L, Rodriguez F, Arkhipova  
979 IR, Barraclough TG. 2021. Evolutionary dynamics of transposable elements in bdelloid rotifers.  
980 *Elife* 10:e63194.
- 981 O'Donnell S, Chaux F, Fischer G. 2020. Highly contiguous Nanopore genome assembly of  
982 *Chlamydomonas reinhardtii* CC-1690. *Microbiol Resour Announc* 9.
- 983 Pei J, Kim BH, Grishin NV. 2008. PROMALS3D: a tool for multiple protein sequence and  
984 structure alignments. *Nucleic Acids Res* 36:2295-2300.
- 985 Penton EH, Crease TJ. 2004. Evolution of the transposable element *Pokey* in the ribosomal  
986 DNA of species in the subgenus *Daphnia* (Crustacea: Cladocera). *Mol Biol Evol* 21:1727-1739.
- 987 Perez-Alegre M, Dubus A, Fernandez E. 2005. REM1, a new type of long terminal repeat  
988 retrotransposon in *Chlamydomonas reinhardtii*. *Mol Cell Biol* 25:10628-10638.
- 989 Pyatkov KI, Arkhipova IR, Malkova NV, Finnegan DJ, Evgen'ev MB. 2004. Reverse  
990 transcriptase and endonuclease activities encoded by *Penelope*-like retroelements. *Proc Natl*  
991 *Acad Sci U S A* 101:14719-14724.
- 992 Robinson JT, Thorvaldsdóttir H, Winckler W, Guttman M, Lander ES, Getz G, Mesirov JP. 2011.  
993 Integrative Genomics Viewer. *Nature Biotechnology* 29:24-26.
- 994 Schön I, Rodriguez F, Dunn M, Martens K, Shribak M, Arkhipova IR. 2021. A survey of  
995 transposon landscapes in the putative ancient asexual ostracod *Darwinula stevensoni*. *Genes*  
996 (Basel) 12:401.
- 997 Schostak N, Pyatkov K, Zelentsova E, Arkhipova I, Shagin D, Shagina I, Mudrik E, Blintsov A,  
998 Clark I, Finnegan DJ, et al. 2008. Molecular dissection of *Penelope* transposable element  
999 regulatory machinery. *Nucleic Acids Res* 36:2522-2529.
- 1000 Smit AFA, Hubley R, Green P. 2015. RepeatMasker Open-4.0. 2013-2015  
1001 <http://www.repeatmasker.org>.
- 1002 Stoddard BL. 2014. Homing endonucleases from mobile group I introns: discovery to genome  
1003 engineering. *Mob DNA* 5:7.
- 1004 Storer J, Hubley R, Rosen J, Wheeler TJ, Smit AF. 2021. The Dfam community resource of  
1005 transposable element families, sequence models, and genome annotations. *Mobile DNA* 12:2.
- 1006 Trifinopoulos J, Nguyen L-T, von Haeseler A, Minh BQ. 2016. W-IQ-TREE: a fast online  
1007 phylogenetic tool for maximum likelihood analysis. *Nucleic Acids Research* 44:W232-W235.

1008 Tujebajeva RM, Copeland PR, Xu XM, Carlson BA, Harney JW, Driscoll DM, Hatfield DL, Berry  
1009 MJ. 2000. Decoding apparatus for eukaryotic selenocysteine insertion. *EMBO Rep* 1:158-163.  
1010 Turanov AA, Lobanov AV, Hatfield DL, Gladyshev VN. 2013. UGA codon position-dependent  
1011 incorporation of selenocysteine into mammalian selenoproteins. *Nucleic Acids Res* 41:6952-  
1012 6959.  
1013 Van Roey P, Meehan L, Kowalski JC, Belfort M, Derbyshire V. 2002. Catalytic domain structure  
1014 and hypothesis for function of GIY-YIG intron endonuclease I-TevI. *Nat Struct Biol* 9:806-811.  
1015 Waterhouse AM, Procter JB, Martin DMA, Clamp M, Barton GJ. 2009. Jalview Version 2—a  
1016 multiple sequence alignment editor and analysis workbench. *Bioinformatics* 25:1189-1191.  
1017 Wells JN, Feschotte C. 2020. A field guide to eukaryotic transposable elements. *Annual Review*  
1018 *of Genetics* 54:539-561.  
1019 Wen W, Weiss SL, Sunde RA. 1998. UGA codon position affects the efficiency of  
1020 selenocysteine incorporation into glutathione peroxidase-1. *J Biol Chem* 273:28533-28541.  
1021 Wicker T, Sabot F, Hua-Van A, Bennetzen JL, Capy P, Chalhoub B, Flavell A, Leroy P,  
1022 Morgante M, Panaud O, et al. 2007. A unified classification system for eukaryotic transposable  
1023 elements. *Nat Rev Genet* 8:973-982.  
1024 Xu Z, Xin T, Bartels D, Li Y, Gu W, Yao H, Liu S, Yu H, Pu X, Zhou J, et al. 2018. Genome  
1025 analysis of the ancient tracheophyte *Selaginella tamariscina* reveals evolutionary features  
1026 relevant to the acquisition of desiccation tolerance. *Mol Plant* 11:983-994.  
1027
